# Supplementary material for: The RNA helicases Dbp2 and Mtr4 regulate the expression of Xrn1-sensitive long non-coding RNAs in yeast
Source: Frontiers journal article supplement (doi:10.3389/frnar.2023.1244554), 2023-08-07
Supplement: Data_Sheet_1.pdf [file Data_Sheet_1.pdf]

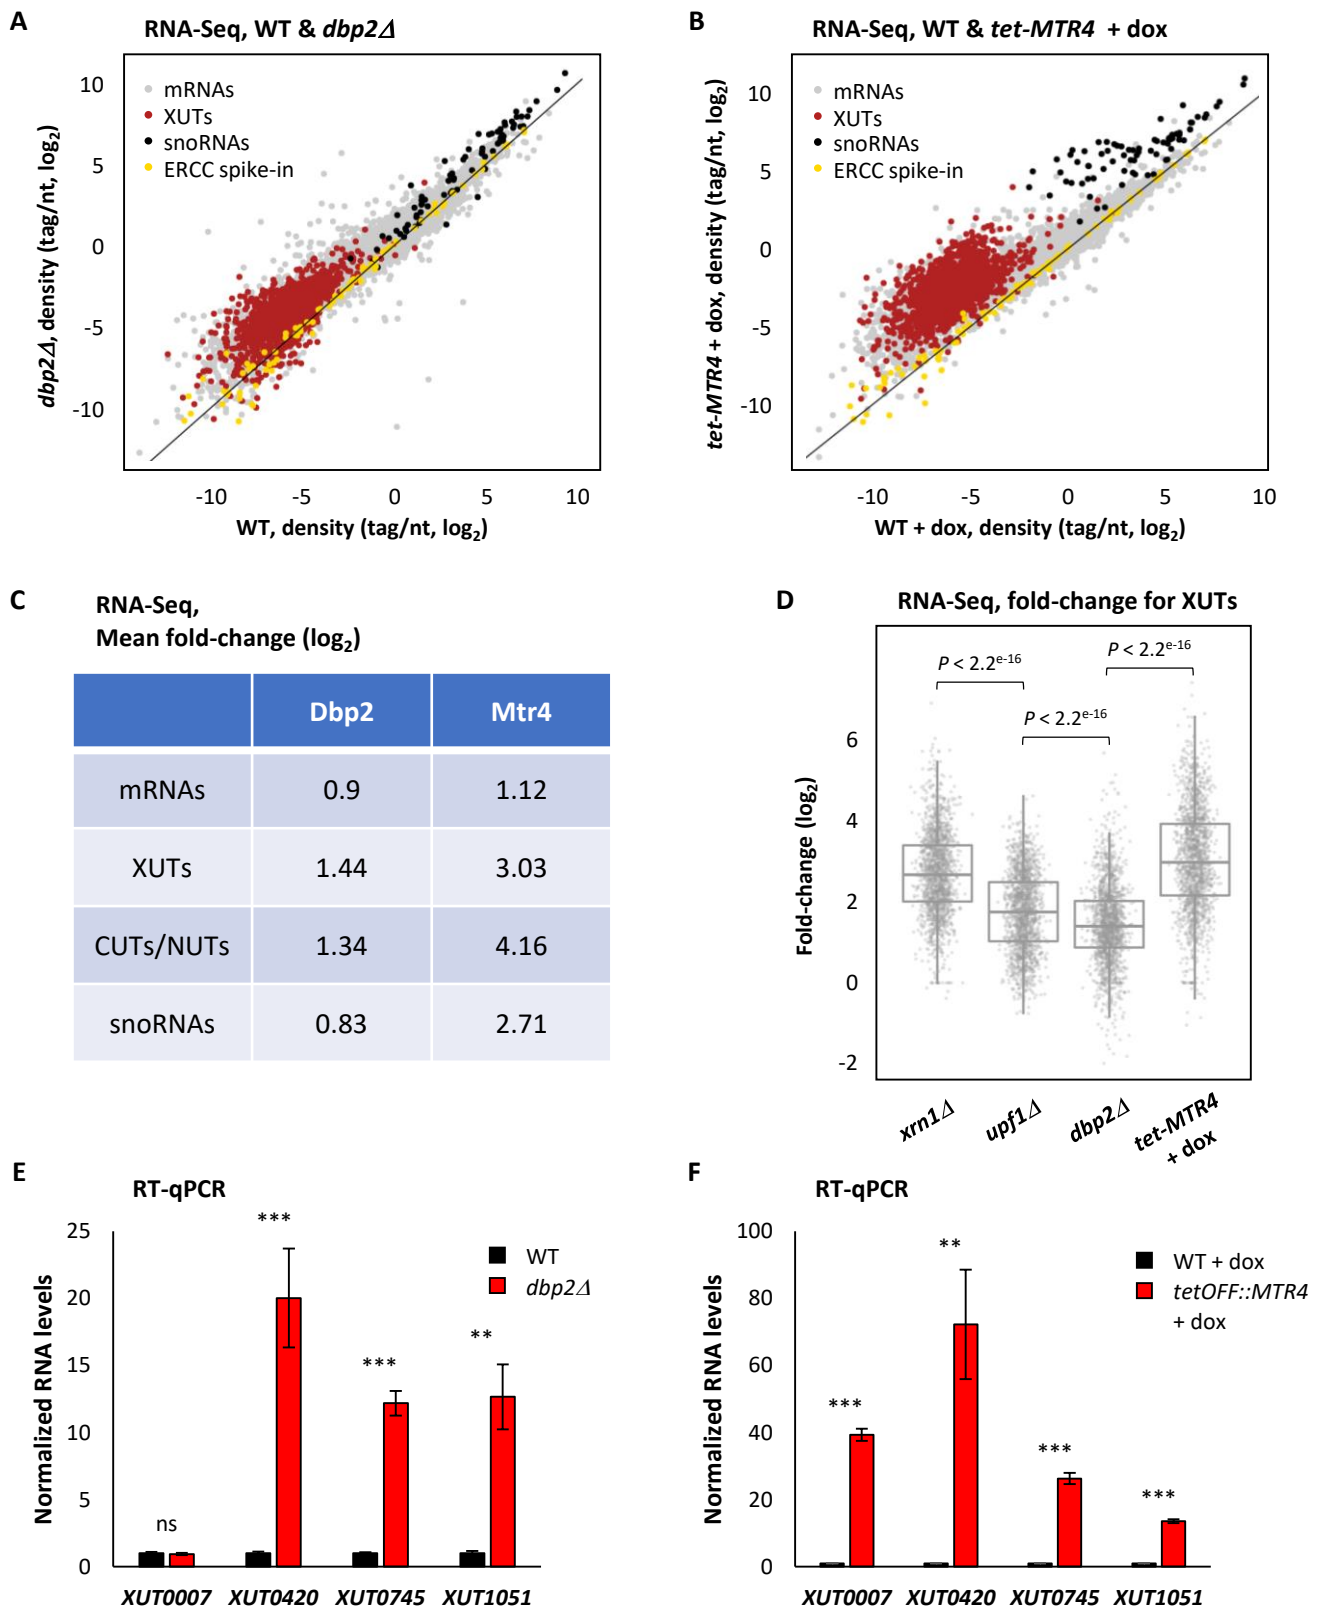

**Figure S1. Identification of Dbp2- and Mtr4-sensitive XUTs.**

**A.** Total RNA-Seq was performed using total RNA extracted from two biological replicates of exponentially growing YAM1 (WT) and YAM2627 (*dbp2Δ*) cells. The data are presented as densities (tag/nt,  $\log_2$  scale) for mRNAs (grey), XUTs (red) and snoRNAs (black) upon normalization on the ERCC spike-in (yellow). **B.** Same as above using YAM115 (WT) and YAM997 (*tetOFF::MTR4*) cells grown in the same conditions and treated for 6 hours with 10  $\mu$ g/ml doxycycline (dox). **C.** Mean fold-change ( $\log_2$ ) for mRNAs, XUTs, CUTs/NUTs and snoRNAs upon inactivation of Dbp2 or depletion of Mtr4. **D.** Box-plot showing the sensitivity of XUTs to Xrn1, Upf1, Dbp2 and Mtr4. The data are presented as the expression fold-change ( $\log_2$ ) between each mutant and its isogenic WT control. Data for the *upf1Δ* mutant were previously described (Wery et al., 2016). *P*-values were obtained upon two-sided Wilcoxon rank-sum test (adjusted for multiple testing with the Benjamini–Hochberg procedure). **E.** YAM1 (WT, black) and YAM2627 (*dbp2Δ*, red) were grown to mid-log phase, at 30°C, in YPD medium. After total RNA extraction, the levels of *XUT007*, *XUT0420*, *XUT0745* and *XUT1051* were assessed by strand-specific RT-qPCR, and then normalized on the *PMA1* mRNA (unaffected housekeeping gene). The normalized level of each XUT in the WT condition was set to 1. Mean and SD values were calculated from three independent biological replicates. \*\* *P* < 0.01; \*\*\* *P* < 0.001; ns, not significant upon t-test. **F.** Same as above using YAM115 (WT, black) and YAM997 (*tetOFF::MTR4*, red) cells grown in the same conditions and then treated for 6 hours with 10  $\mu$ g/ml doxycycline (dox).

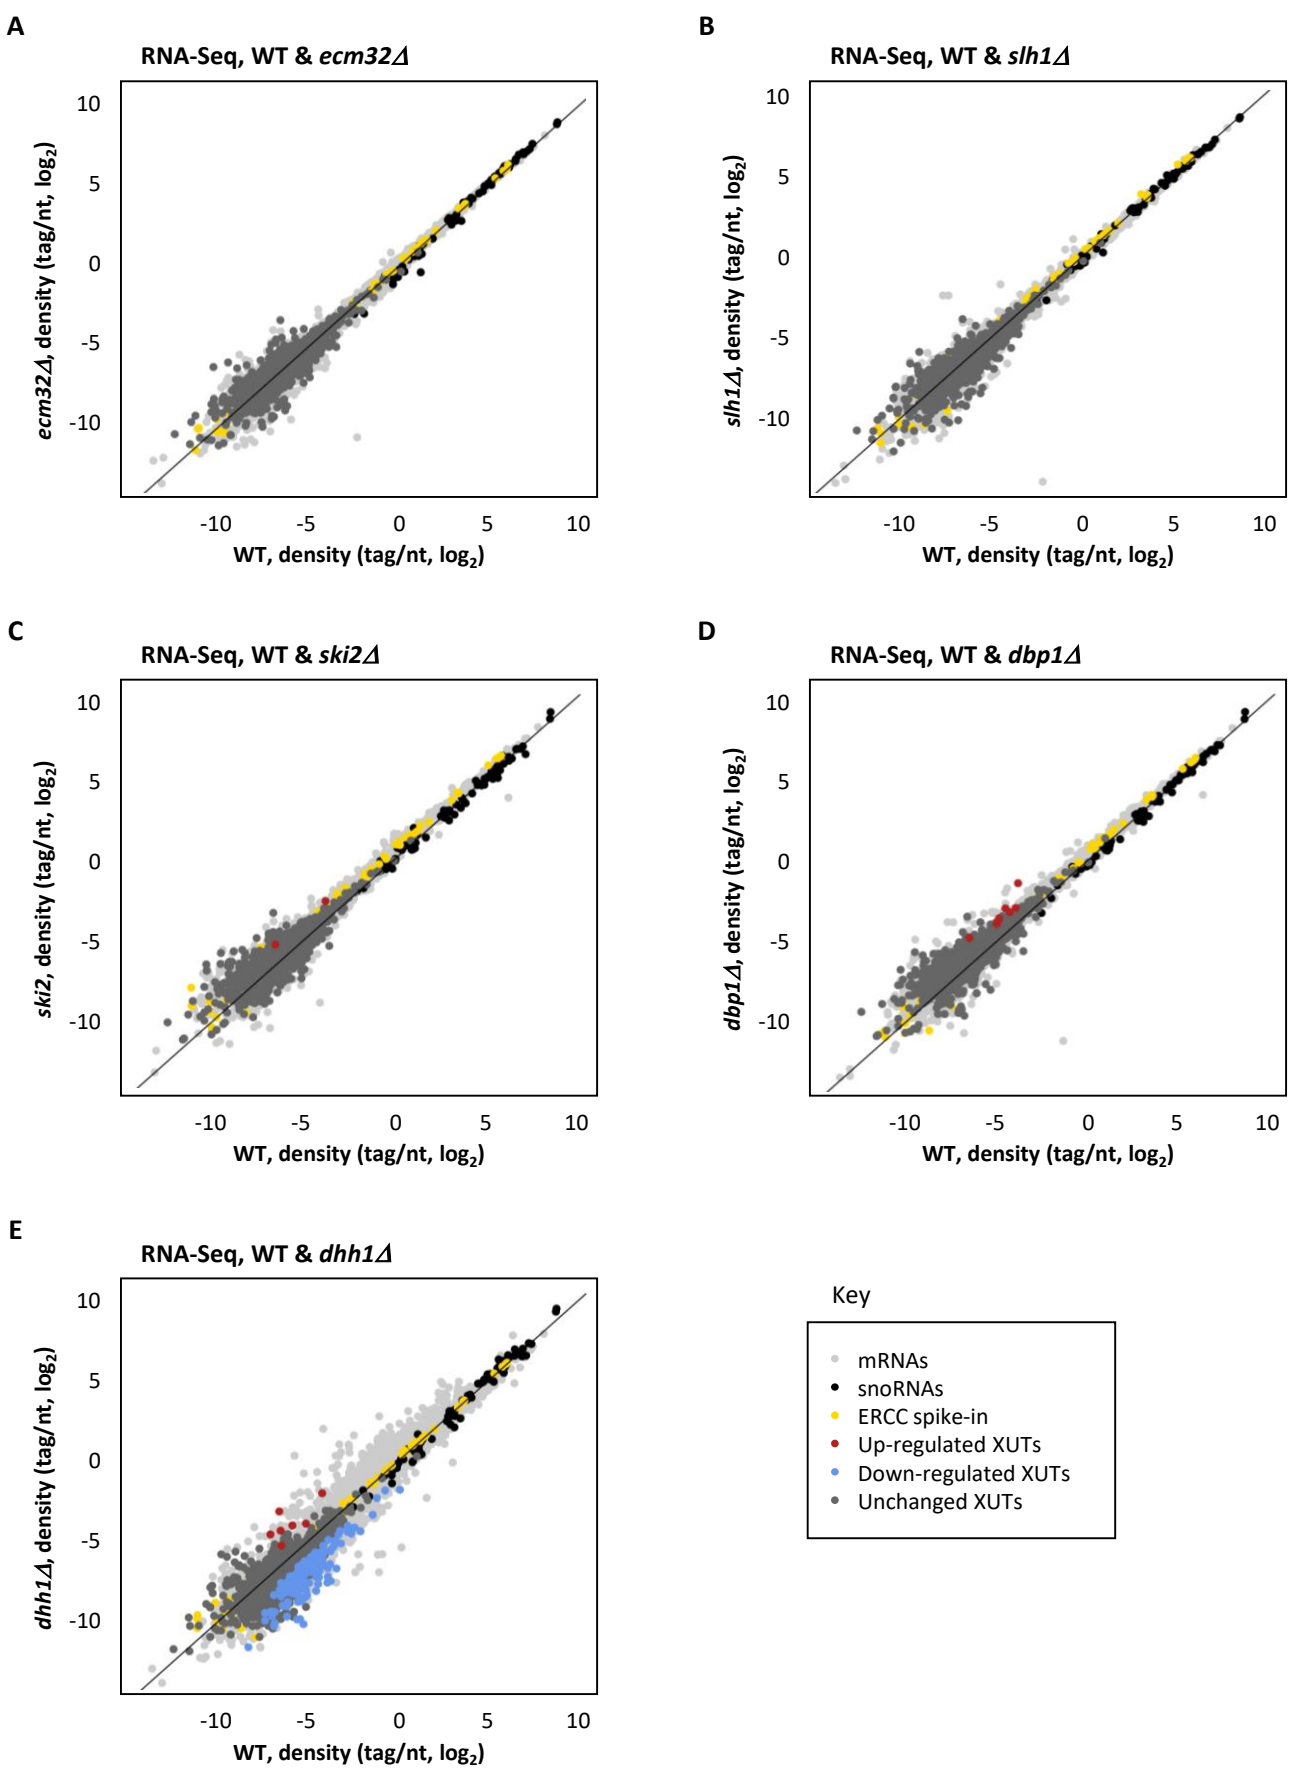

**Figure S2. XUTs do not globally accumulate upon inactivation of the Ecm32, Ski2, Slh1, Dbp1 and Dhh1 RNA helicases.**

**A.** Total RNA-Seq was performed using total RNA extracted from two biological replicates of exponentially growing YAM1 (WT) and YAM2834 (*ecm32Δ*) cells. The data are presented as densities (tag/nt,  $\log_2$  scale) for mRNAs (light grey), XUTs (dark grey when unaffected), snoRNAs (black) and the ERCC spike-in (yellow). **B.** Same as above using YAM2835 (*slh1Δ*) cells. **C.** Same as above using YAM2628 (*ski2Δ*) cells. The red dots represent the 2 up-regulated XUTs (*ski2Δ*/WT > 2 and adjusted *P*-value < 0.05). **D.** Same as above using YAM2630 (*dbp1Δ*) cells. The red dots represent the 8 up-regulated XUTs (*dbp1Δ*/WT > 2 and adjusted *P*-value < 0.05). **E.** Same as above using YAM2632 (*dhh1Δ*) cells. The red and blue dots represent the 7 up-regulated XUTs (*dhh1Δ*/WT > 2 and adjusted *P*-value < 0.05) and the 185 down-regulated XUTs (*dhh1Δ*/WT < 0.5 and adjusted *P*-value < 0.05), respectively.

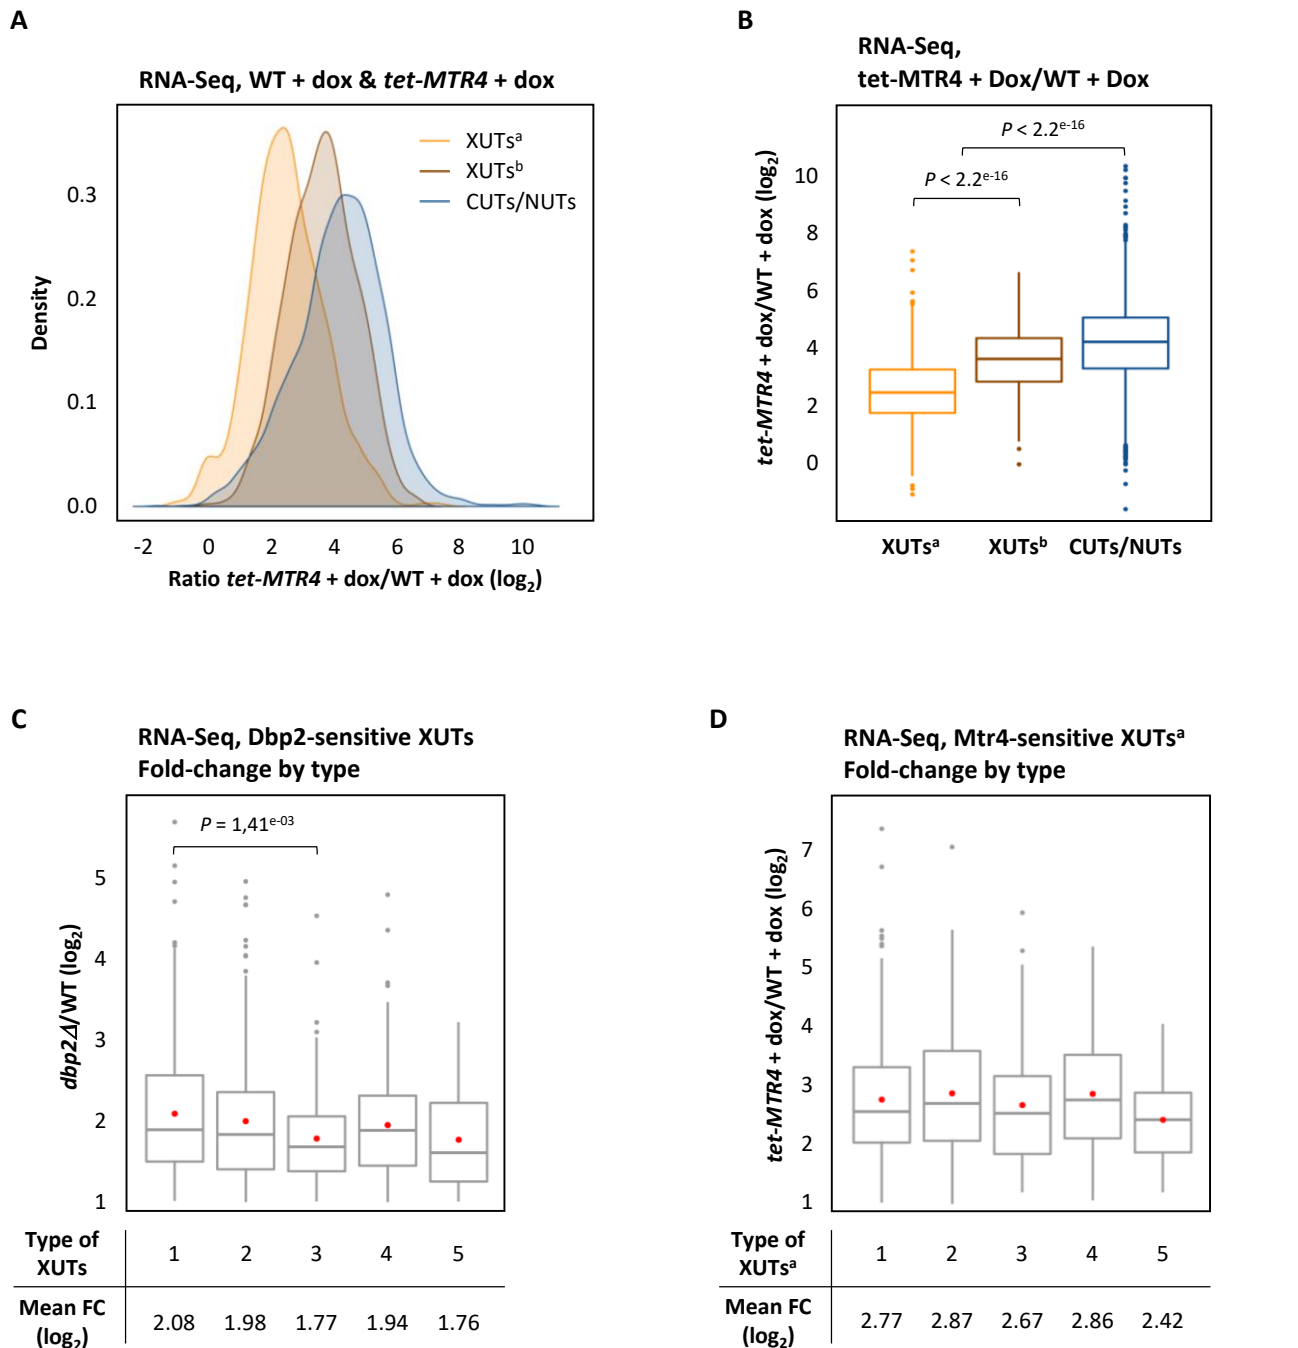

**Figure S3. *Dbp2* and *Mtr4* target XUTs independently of their configuration to protein-coding genes.**

**A.** XUTs were separated into two subsets according the overlap ( $\geq 1$  nt) or not with a CUT or a NUT. The sensitivity to *Mtr4* of each subset is presented as a density-plot of the expression fold-change upon 6 hours of *Mtr4* depletion (ratio of tag densities, log<sub>2</sub> scale). The orange, brown and blue curves represent the *Mtr4*-sensitivity of XUTs<sup>a</sup> (no overlap with a CUT/NUT), XUTs<sup>b</sup> ( $\geq 1$  nt overlap with a CUT/NUT) and CUTs/NUTs, respectively. **B.** Box-plot showing the *Mtr4*-sensitivity of XUTs<sup>a</sup>, XUTs<sup>b</sup> and CUTs/NUTs. The data are presented as the expression fold-change (log<sub>2</sub> scale) for each subset of transcript upon *Mtr4* depletion. *P*-values were obtained upon two-sided Wilcoxon rank-sum test (adjusted for multiple testing with the Benjamini–Hochberg procedure). **C.** Sensitivity to *Dbp2* for the five types of XUTs, defined according to their configuration relative to sense mRNAs (see Figure 3A). The data are represented as a box-plot of the expression fold-change (log<sub>2</sub> scale) for each type of XUTs in the *dbp2Δ* mutant relative to the isogenic WT control. The red point indicates the mean-fold change for each type of XUTs (also indicated below the plot). The indicated *P*-value was obtained upon two-sided Wilcoxon rank-sum test (adjusted for multiple testing with the Benjamini–Hochberg procedure). The *P*-values for all other comparisons were  $> 0.05$  (not significant). **D.** Same as above for the *Mtr4*-sensitive XUTs<sup>a</sup> subset. The *P*-values (obtained as above) for all other comparisons were  $> 0.05$  (not significant).

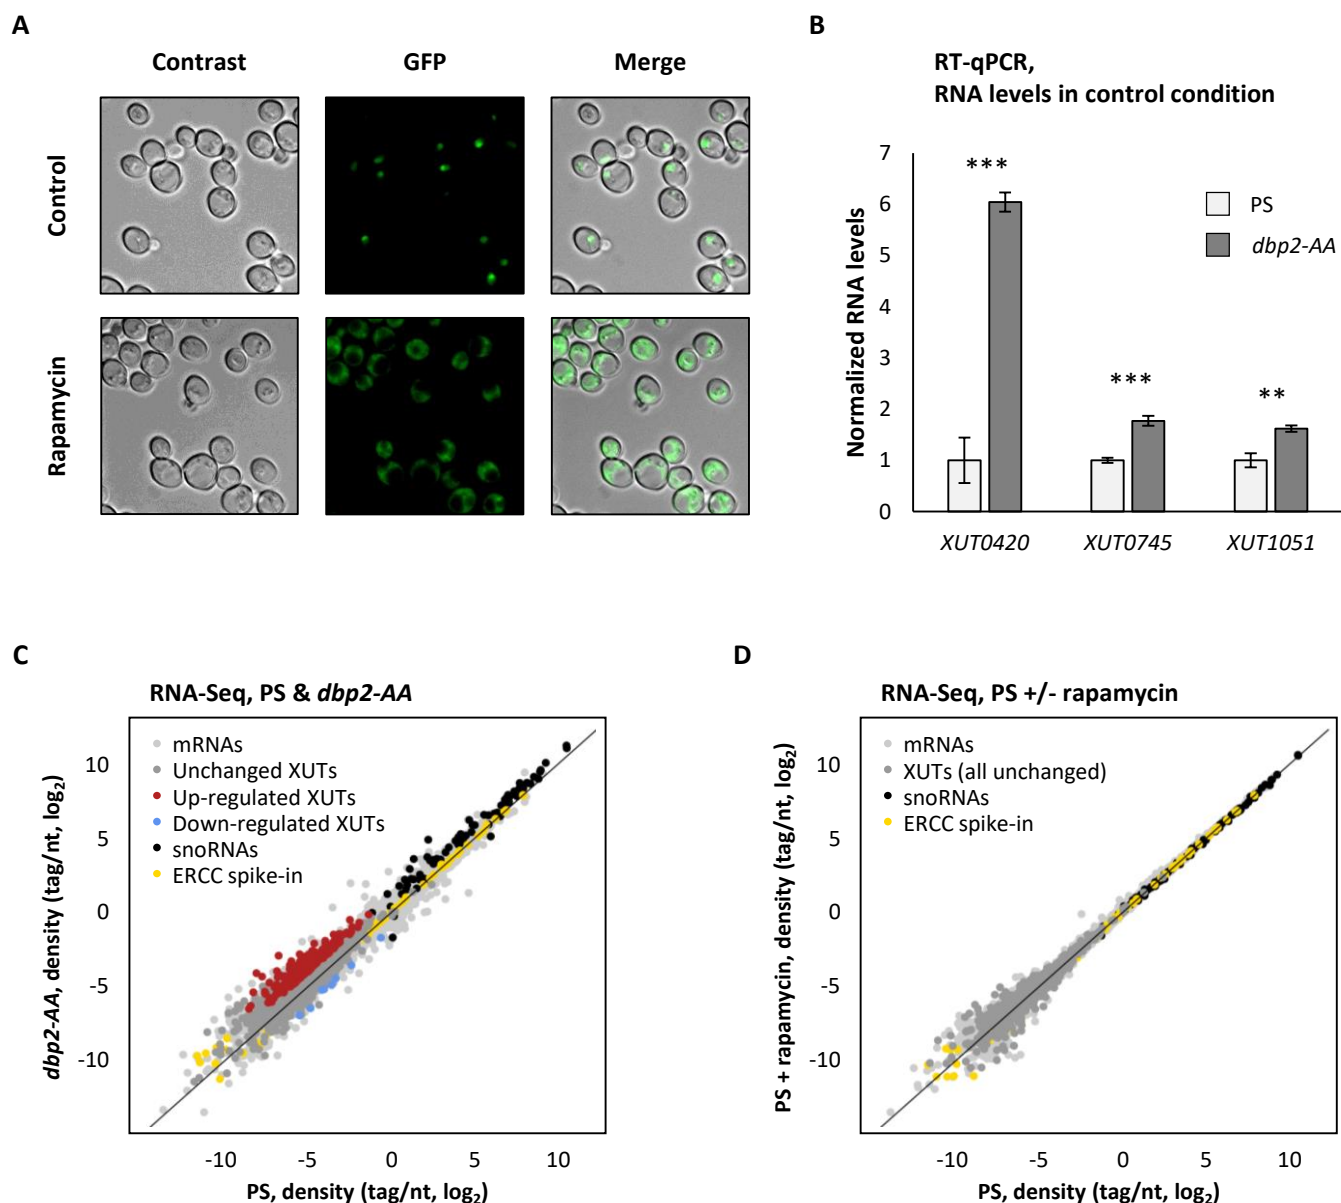

**Figure S4. XUTs are insensitive to Dbp2 nuclear depletion.**

**A.** Rapamycin-dependent nuclear depletion of Dbp2-FRB-GFP using anchor away (Dbp2-AA). Dbp2-FRB-GFP was detected on living YAM2673 cells by fluorescent microscopy before (upper row) and after 60 min (bottom row) of treatment with rapamycin. **B.** YAM2672 (parental strain, PS) and YAM2673 (*dbp2-AA*) cells were grown to mid-log phase, at 30°C, in YPD medium. After total RNA extraction, the levels of *XUT0420*, *XUT0745* and *XUT1051* were assessed by strand-specific RT-qPCR, and then normalized on the *PMA1* mRNA (unaffected housekeeping gene). The normalized level of each XUT in the PS condition was set to 1. Mean and SD values were calculated from three independent biological replicates. \*\*  $P < 0.01$ ; \*\*\*  $P < 0.001$  upon t-test. **C.** Total RNA-Seq was performed using the same RNA extracts as above. The data are presented as densities (tag/nt, log<sub>2</sub> scale) for mRNAs (light grey), unaffected XUTs (dark grey), up-regulated XUTs (red), down-regulated XUTs (blue), snoRNAs (black) and the ERCC spike-in (yellow). **D.** Same as C using total RNA extracted from YAM2672 (PS) cells grown as above and then treated or not for 60 min with rapamycin (1 µg/ml, final concentration).
